# Supplementary material for: Bioinformatic pipelines for whole transcriptome sequencing data exploitation in leukemia patients with complex structural variants
Source: PeerJ. 2019 Jun 12;7:e7071. doi: 10.7717/peerj.7071 (PMC6571010; doi:10.7717/peerj.7071)
Supplement: Table S1 — The table depicts comparison of numbers of genes identified as differentially expressed using PComp approach for RNA-Seq data analysis and one-way ANOVA statistical test for transcriptomic array. The concordance was calculated as percentage of genes assigned concordantly between the methods. [file peerj-07-7071-s001.xlsx]

## Sheet: Sheet1
RNA-seq expression analysis (PComp)	GeneChip® Human Transcriptome Array 2.0				concordance of the methods [%]
			UP	DOWN
	T1	UP	351	9	97.4359
		DOWN	1	29
	T2	UP	54	1	98.2143
		DOWN	0	1
	T3	UP	22	0	100
		DOWN	0	3
	T4	UP	207	1	99.635
		DOWN	0	66
	T5	UP	78	0	99
		DOWN	1	21
	T6	UP	178	1	99.5392
		DOWN	0	38
	T7	UP	164	0	100
		DOWN	0	15
	T8	UP	682	14	98.1358
		DOWN	0	55
	T9	UP	27	0	100
		DOWN	0	3
	T10	UP	45	0	100
		DOWN	0	5
