# Supplementary material for: Bioinformatic pipelines for whole transcriptome sequencing data exploitation in leukemia patients with complex structural variants
Source: PeerJ. 2019 Jun 12;7:e7071. doi: 10.7717/peerj.7071 (PMC6571010; doi:10.7717/peerj.7071)
Supplement: Table S3 — Overall 40 fusion genes in 8 out of 10 tested samples were identified using consensus meta-caller step. True/false positive gene fusions were assessed manually based on visual inspection of genomic array data (NA, not assessed; FP, false positive; TP, true positive). [file peerj-07-7071-s003.xlsx]

## Sheet: Sheet1
Sample	Gene1	Chr1	Gene2	Chr2	EricScript	FusionCatcher	JAFFA	Genomic array	Result	Explanation
T1	CXCR4	2	PTMA	2	1	0	1	0	NA	potentially TP
T1	CYTIP	2	ERMN	2	1	1	0	0	FP	read-through
T1	FAM126B	2	SP110	2	1	1	1	1	TP
T1	HACL1	3	COLQ	3	1	1	0	0	FP	read-through
T1	HNRNPA2B1	7	DDX5	17	0	1	1	0	NA	potentially TP
T1	PDE7A	8	LINC01301	8	0	1	1	1	TP
T1	PDE7A	8	UBE2V2	8	1	1	1	1	TP
T1	YWHAZ	8	ZNF706	8	1	1	0	0	FP	read-through
T1	ZMYM5	13	PSPC1	13	1	1	0	0	FP	read-through
T2	EPN1	19	ZSCAN22	19	0	1	1	1	TP
T2	MFSD7	4	ATP5I	4	1	1	0	0	FP	read-through
T3	ZMYM5	13	PSPC1	13	1	1	0	0	FP	read-through
T4	CYTIP	2	ERMN	2	1	1	0	0	FP	read-through
T4	WBP2	17	SUMO2	17	1	1	0	1	TP
T5	DARS	2	MUT	6	1	0	1	1	TP
T5	GCC2	2	AC007403.2	2	0	1	1	1	TP
T5	HACL1	3	COLQ	3	1	1	0	0	FP	read-through
T6	NMD3	3	LINC01322	3	0	1	1	1	TP
T7	LINCPINT	7	MKLN1	7	0	1	1	0	FP	read-through
T7	MFSD7	4	ATP5I	4	1	1	0	0	FP	read-through
T7	MRPS31	13	COG6	13	0	1	1	1	TP
T7	SCEL	13	LRRC2	3	0	1	1	1	TP
T7	UQCRC1	3	SCEL	13	0	1	1	1	TP
T7	ZMYM5	13	PSPC1	13	1	1	0	0	FP	read-through
T8	ZMYM5	13	PSPC1	13	1	1	0	0	FP	read-through
T9	ETV6	12	CTHRC1	8	0	1	1	1	TP
T9	FOSB	19	DDX5	17	0	1	1	0	NA	potentially TP
T9	HACL1	3	COLQ	3	1	1	0	0	FP	read-through
T9	ZMYM5	13	PSPC1	13	1	1	0	0	FP	read-through
T10	ASH1L	1	SMG5	1	1	1	1	1	TP
T10	CCT3	1	ZBTB41	1	0	1	1	1	TP
T10	CLNK	4	CYTL1	4	0	1	1	1	TP
T10	CXCR4	2	DDX5	17	0	1	1	0	NA	potentially TP
T10	FGFR1OP	6	MPDZ	9	0	1	1	1	TP
T10	HACD4	9	TSTD2	9	1	1	0	1	TP
T10	MFSD7	4	ATP5I	4	1	1	0	0	FP	read-through
T10	NFATC3	16	PLA2G15	16	1	1	0	0	FP	read-through
T10	SMG5	1	ASH1L	1	1	1	0	1	TP
T10	ZBTB41	1	SMG5	1	1	1	0	1	TP
T10	ZMYM5	13	PSPC1	13	1	1	0	0	FP	read-through
